# Supplementary material for: Stabilized photoemission from organic molecules in zero-dimensional hybrid Zn and Cd halides
Source: Royal Society of Chemistry journal article supplement (doi:10.1039/d2qi01293f), 2022-01-01
Supplement: d2qi01293f1.pdf [file d2qi01293f1.pdf]

## Supporting Information

# Stabilized photoemission from organic molecules in zero-dimensional hybrid Zn and Cd halides

*Tielyr D. Creason,<sup>1</sup> Hadiah Fattal,<sup>1</sup> Isaiah W. Gilley,<sup>1</sup> Brett N. Evans,<sup>1</sup> Jie Jiang,<sup>2</sup> Ruth Pachter,<sup>2</sup> Daniel T. Glatzhofer,<sup>1</sup> and Bayram Saparov<sup>1\*</sup>*

<sup>1</sup>Department of Chemistry and Biochemistry, University of Oklahoma, 101 Stephenson Parkway, Norman, OK 73019, United States

<sup>2</sup>Air Force Research Laboratory, Materials and Manufacturing Directorate, Wright-Patterson Air Force Base, OH, USA

\*Corresponding authors: [saparov@ou.edu](mailto:saparov@ou.edu)

**Table S1.** Selected single crystal data and structure refinement parameters for R<sub>2</sub>CdCl<sub>4</sub>.

| Formula                                                       | (C <sub>13</sub> H <sub>12</sub> N) <sub>2</sub> CdCl <sub>4</sub> |
|---------------------------------------------------------------|--------------------------------------------------------------------|
| Formula weight (g/mol)                                        | 618.67                                                             |
| Temperature (K)                                               | 295(2)                                                             |
| Radiation, wavelength (Å)                                     | Mo Kα, 0.71073                                                     |
| Crystal system                                                | Monoclinic                                                         |
| Space group                                                   | C2/c                                                               |
| Z                                                             | 4                                                                  |
| Unit cell parameters                                          | <i>a</i> = 14.909(3) Å                                             |
|                                                               | <i>b</i> = 12.1382(17) Å                                           |
|                                                               | <i>c</i> = 15.403(8) Å                                             |
|                                                               | β = 104.058(4)°                                                    |
| Volume (Å <sup>3</sup> )                                      | 2704.0(8)                                                          |
| Density (ρ <sub>calc</sub> ) (g/cm <sup>3</sup> )             | 1.520                                                              |
| Absorption coefficient (μ) (mm <sup>-1</sup> )                | 1.220                                                              |
| θ <sub>min</sub> – θ <sub>max</sub> (°)                       | 2.190 – 24.711                                                     |
| Reflections collected                                         | 24977                                                              |
| Independent reflections                                       | 2302                                                               |
| <i>R</i> <sup>a</sup> indices ( <i>I</i> > 2σ( <i>I</i> ))    | <i>R</i> <sub>1</sub> = 0.0413                                     |
|                                                               | <i>wR</i> <sub>2</sub> = 0.0791                                    |
| Goodness-of-fit on <i>F</i> <sup>2</sup>                      | 1.224                                                              |
| Largest diff. peak and hole (e <sup>-</sup> /Å <sup>3</sup> ) | 0.440 and -0.235                                                   |

$${}^aR_1 = \sum ||F_0| - |F_c|| / \sum |F_0|; WR_2 = |\Sigma|w(F_0^2 - F_c^2)^2| / \sum |wF_0^{22}|_{1/2}$$

where  $w = 1/|\sigma^2F_0^2 + (AP)^2 + BP|$ , with  $P = (F_0^2 + 2F_c^2)/3$  and weight coefficients *A* and *B*

**Table S2.** Atomic coordinates and equivalent isotropic displacement parameters ( $U_{\text{eq}}^a$ ) for  $\text{R}_2\text{CdCl}_4$ .

| Atom  | <i>x</i>   | <i>y</i>    | <i>z</i>    | $U_{\text{eq}}, \text{\AA}^2$ |
|-------|------------|-------------|-------------|-------------------------------|
| Cd(1) | 0.000000   | 0.29030(5)  | 0.250000    | 0.0934(2)                     |
| Cl(1) | 0.09694(8) | 0.39169(13) | 0.17127(9)  | 0.1058(5)                     |
| Cl(2) | 0.11555(8) | 0.16940(13) | 0.34604(11) | 0.1256(6)                     |
| N(1)  | 0.2897(3)  | 0.3416(6)   | 0.3283(4)   | 0.136(2)                      |
| C(1)  | 0.3335(4)  | 0.2750(6)   | 0.3920(5)   | 0.161(3)                      |
| C(2)  | 0.4240(4)  | 0.2909(6)   | 0.4311(4)   | 0.131(2)                      |
| C(3)  | 0.4705(3)  | 0.3769(5)   | 0.4052(3)   | 0.0922(15)                    |
| C(4)  | 0.4220(4)  | 0.4415(5)   | 0.3388(4)   | 0.1076(17)                    |
| C(5)  | 0.3319(4)  | 0.4247(6)   | 0.2998(4)   | 0.123(2)                      |
| C(6)  | 0.5683(4)  | 0.4017(5)   | 0.4445(4)   | 0.1087(18)                    |
| C(7)  | 0.6233(4)  | 0.3556(5)   | 0.5085(4)   | 0.1125(18)                    |
| C(8)  | 0.7215(3)  | 0.3805(5)   | 0.5484(4)   | 0.0939(15)                    |
| C(9)  | 0.7653(4)  | 0.3261(5)   | 0.6239(4)   | 0.1171(19)                    |
| C(10) | 0.8554(4)  | 0.3452(5)   | 0.6636(4)   | 0.130(2)                      |
| C(11) | 0.9051(4)  | 0.4194(5)   | 0.6293(4)   | 0.1062(17)                    |
| C(12) | 0.8643(4)  | 0.4745(5)   | 0.5549(4)   | 0.118(2)                      |
| C(13) | 0.7720(4)  | 0.4557(5)   | 0.5133(4)   | 0.1116(18)                    |

<sup>a</sup> $U_{\text{eq}}$  is defined as one-third of the trace of the orthogonalized  $U_{ij}$  tensor.

**Table S3.** A comparison of bond distances and angles within the  $[CdCl_4]^{2-}$  tetrahedra in  $R_2CdCl_4$ .

| <b>Atom pair</b> | <b>Distance (Å)</b> | <b>Label</b>  | <b>Angle (°)</b> |
|------------------|---------------------|---------------|------------------|
| Cd – Cl1         | 2.4343(14)          | Cl1-Cd-Cl1    | 119.26(7)        |
| Cd – Cl2         | 2.4641(14)          | Cl1-Cd-Cl2 ×2 | 100.78(5)        |
|                  |                     | Cl1-Cd-Cl2 ×2 | 114.53(6)        |
|                  |                     | Cl2-Cd-Cl2    | 106.90           |

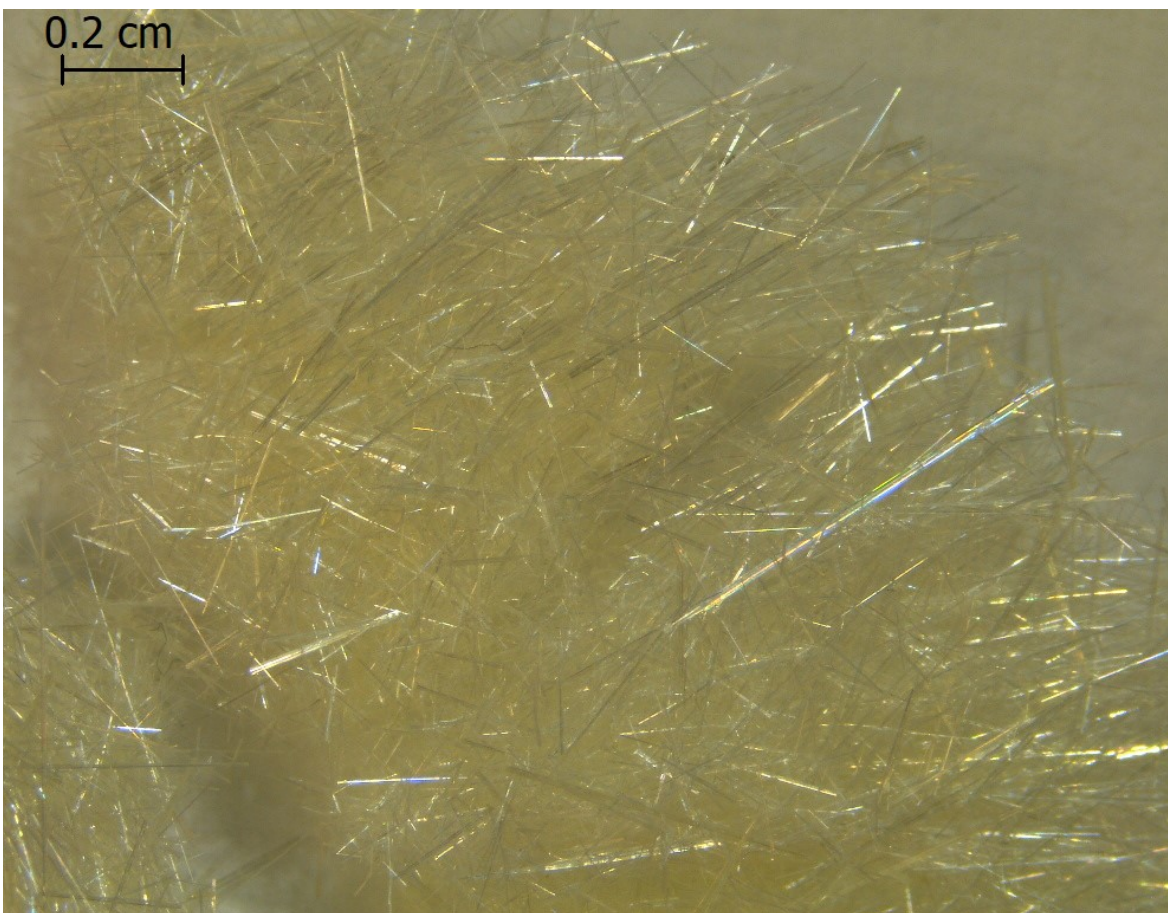

**Fig. S1.** Picture of RCl single crystals synthesized from slow evaporation.

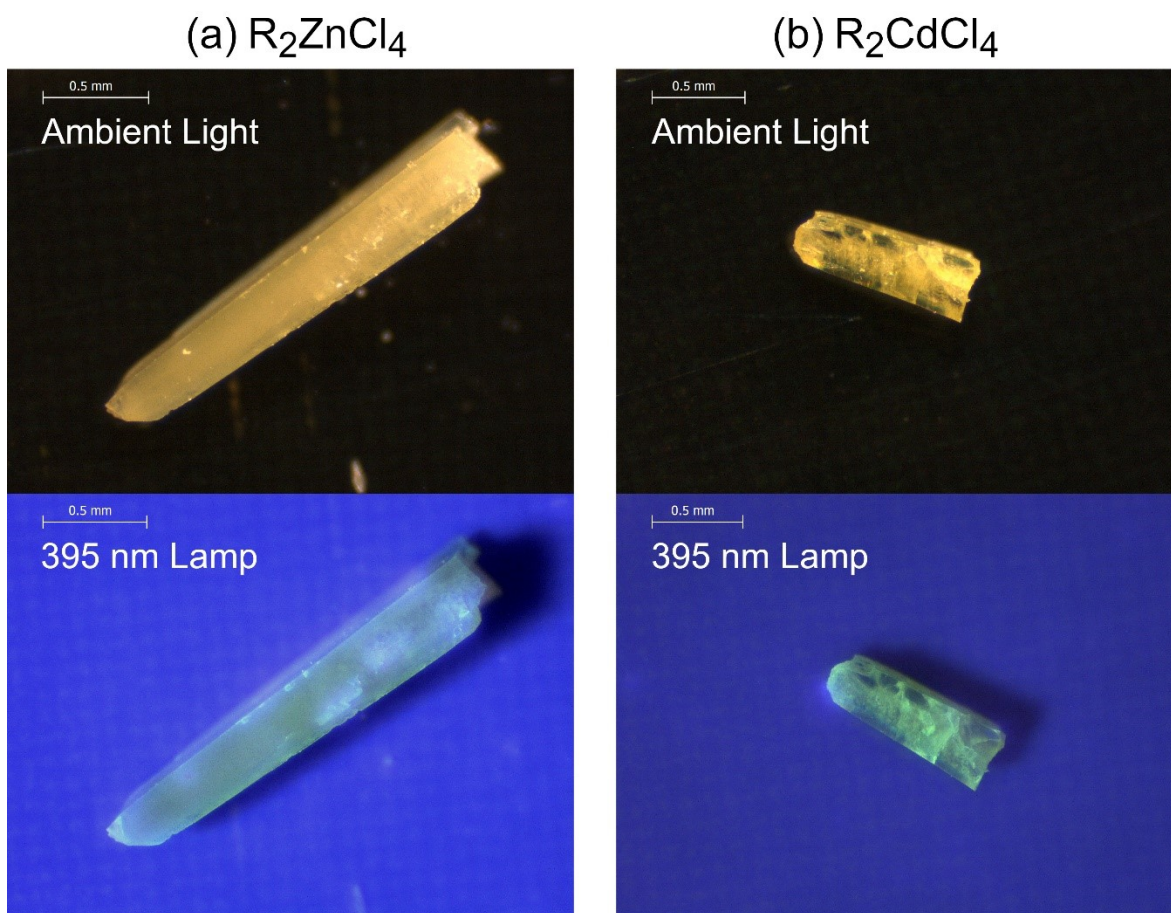

**Fig. S2.** Pictures of (a)  $R_2ZnCl_4$  and (b)  $R_2CdCl_4$  single crystals under (top) ambient light and (bottom) a 395 nm lamp.

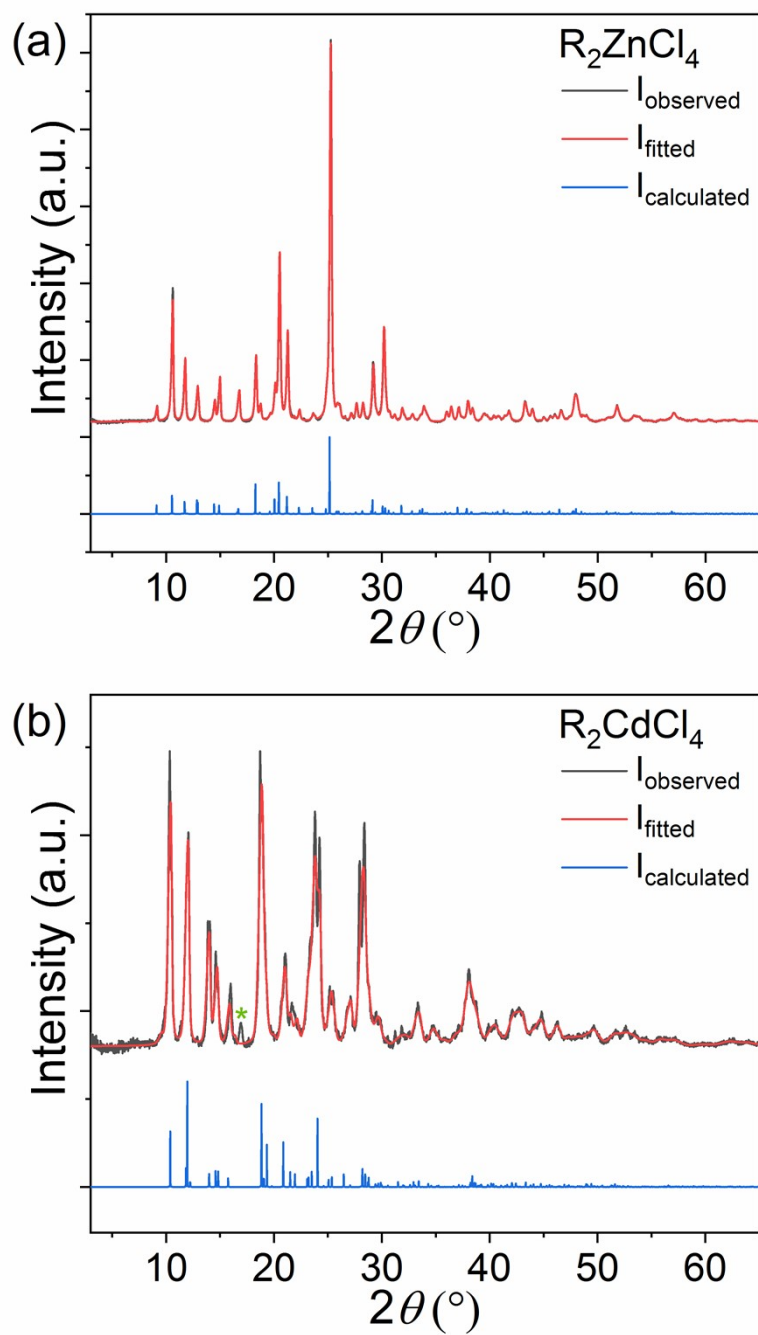

**Fig. S3.** Room temperature powder X-ray diffraction (PXRD) patterns of (a)  $R_2ZnCl_4$  and (b)  $R_2CdCl_4$ . The green asterisk represents a small impurity of RCl that forms when grinding  $R_2CdCl_4$ .

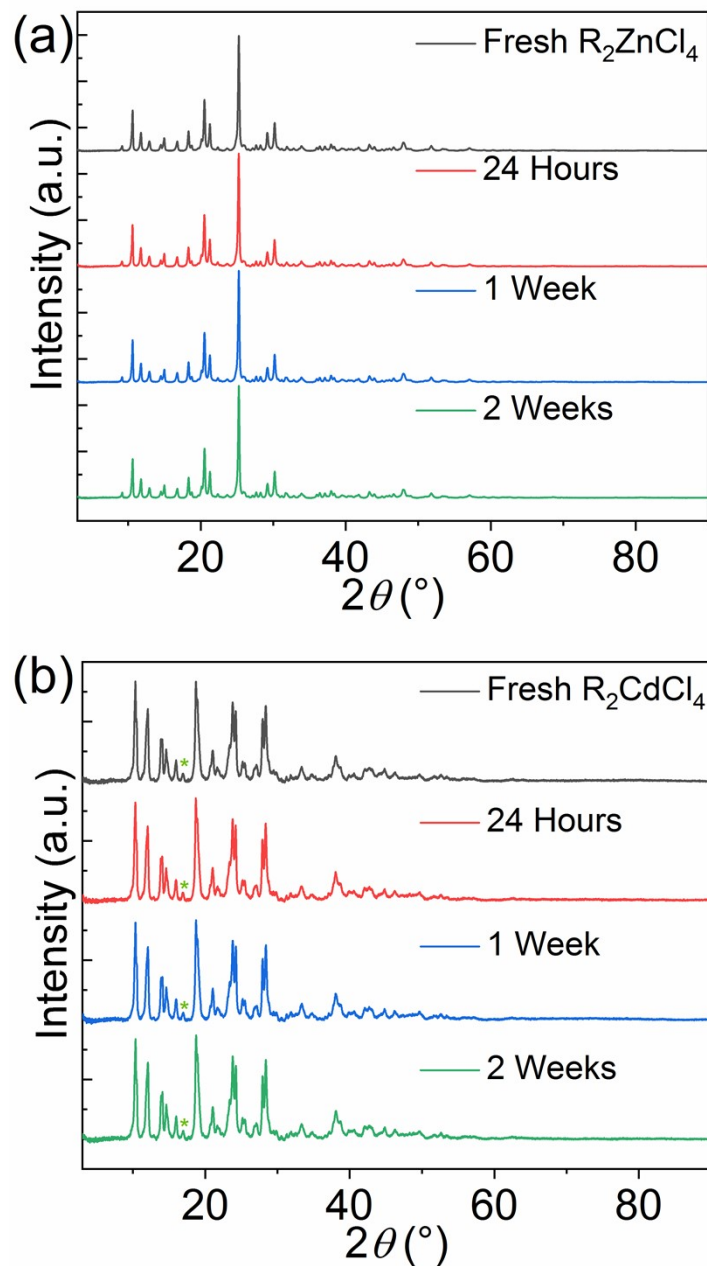

**Fig. S4.** PXR D measured over a 2-week period for (a)  $R_2ZnCl_4$  and (b)  $R_2CdCl_4$ . When left in ambient air, neither sample demonstrates noticeable degradation. The green asterisk indicates the presence of RCl impurity formed during the PXR D sample preparation.



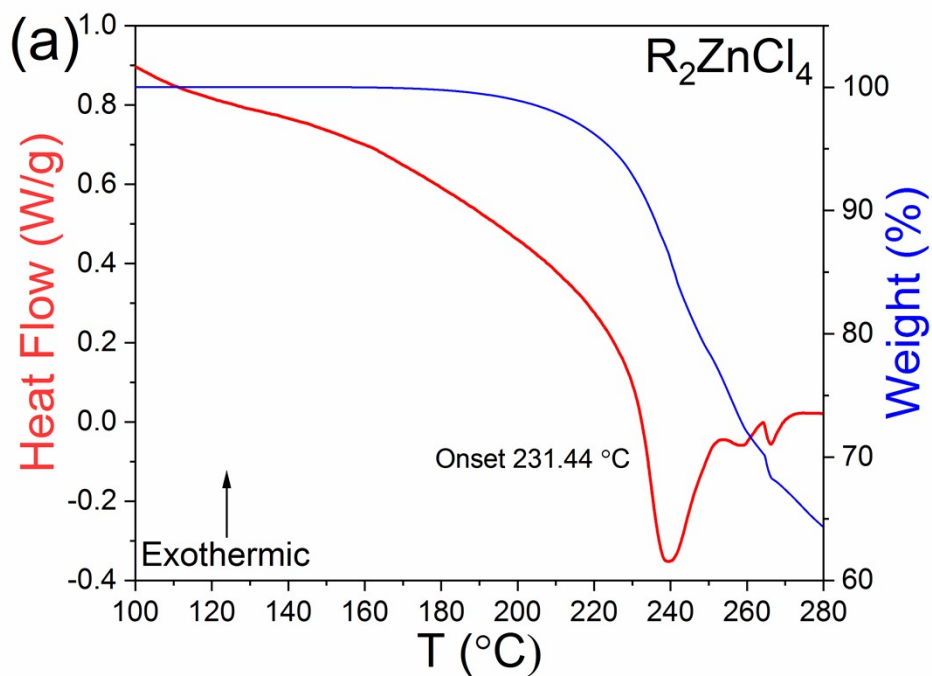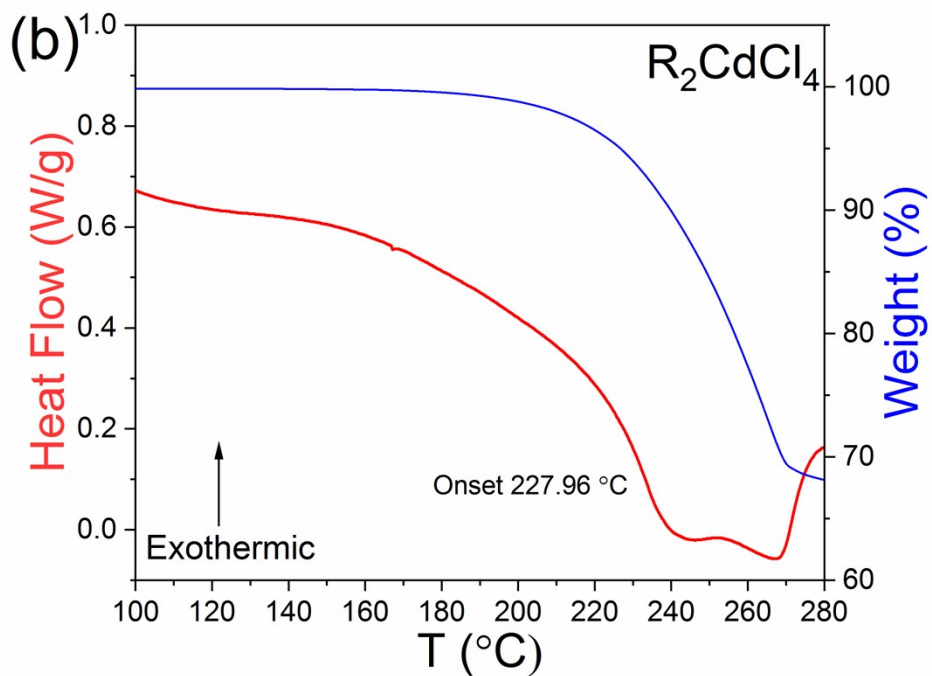

**Fig. S5.** Thermogravimetric analysis (TGA, in blue) and differential scanning calorimetry (DSC, in red) plots for (a)  $R_2ZnCl_4$  and (b)  $R_2CdCl_4$ .

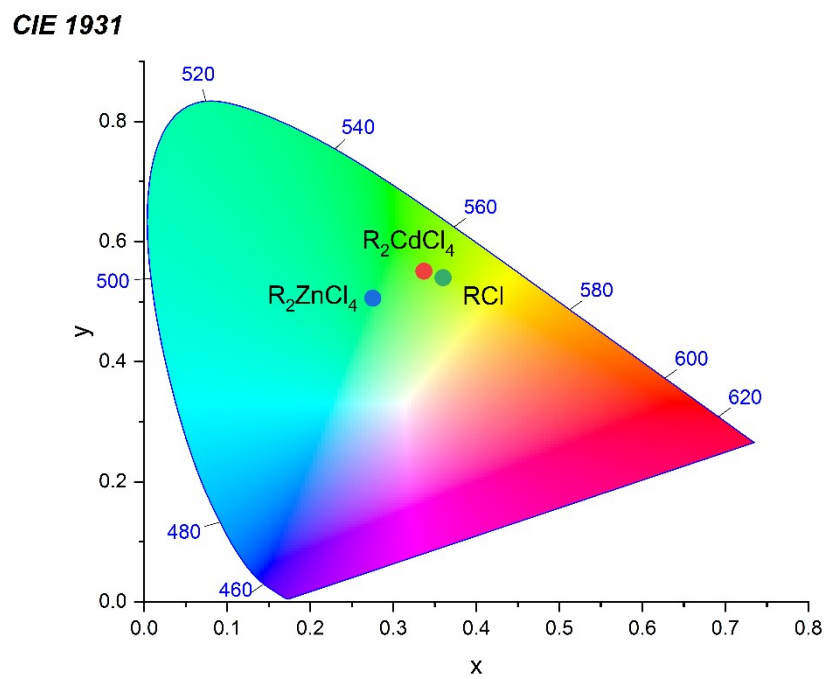

**Fig. S6.** The Commission Internationale de l'Eclairage (CIE) emission color coordinates for  $R_2ZnCl_4$  (blue dot),  $R_2CdCl_4$  (red dot), and  $RCl$  (green dot).

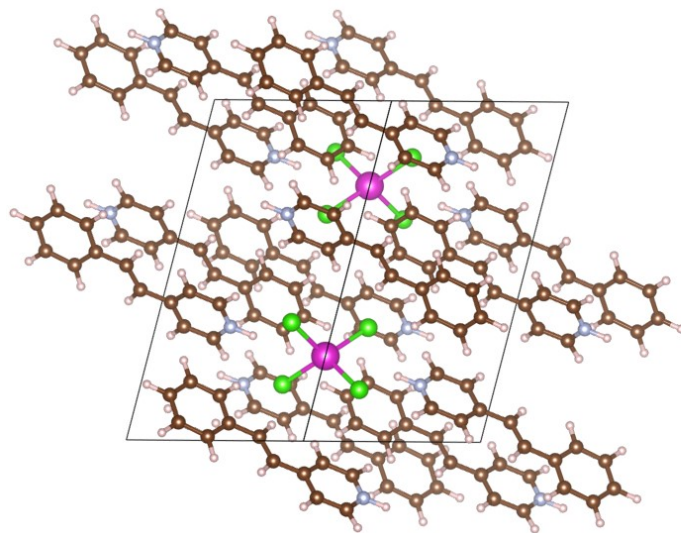

**Fig. S7.** DFT-optimized (PBE functional) primitive unit cell for R<sub>2</sub>CdCl<sub>4</sub>

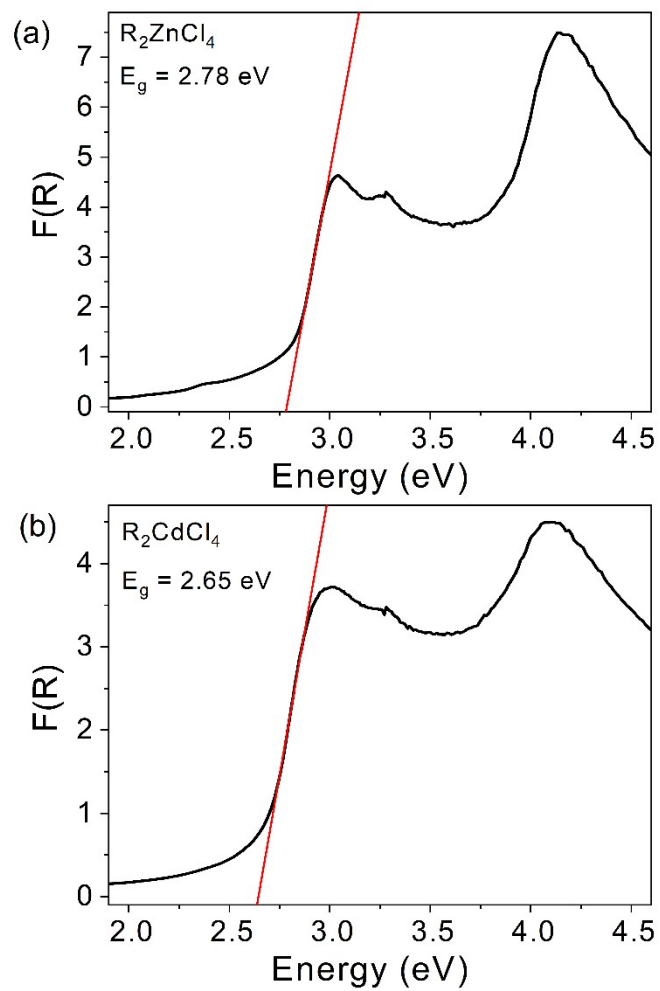

**Fig. S8.** The Kubelka-Munk pseudoabsorbance plots for (a)  $R_2ZnCl_4$  and (b)  $R_2CdCl_4$ .
